# Supplementary material
Source: PubMed Central journal article supplement (PMC4031290)
Supplement: NIHMS556617-supplement-775_2013_1081_MOESM1_ESM.pdf [file NIHMS556617-supplement-775_2013_1081_MOESM1_ESM.pdf]

# Nitric Oxide (NO) Generation from Heme/Copper Assembly Mediated Nitrite Reductase Activity

Shabnam Hematian, Maxime A. Siegler and Kenneth D. Karlin\*

*Department of Chemistry, The Johns Hopkins University, Baltimore, Maryland 21218, United States*

## ELECTRONIC SUPPLEMENTARY MATERIAL

### Contents:

**Fig. S1.** UV-vis spectra of  $[(AN)Cu^{II}(Cl)](CF_3SO_3)$  and  $[(AN)Cu^{II}(NO_2)](CF_3SO_3)$  in acetone

**Fig. S2.** UV-vis spectra of  $[(AN)Cu^{II}(Cl)](CF_3SO_3)$  and  $[(AN)Cu^{II}(NO_2)](CF_3SO_3)$  in MeOH

**Fig. S3.** EPR spectrum of  $[(AN)Cu^{II}(Cl)](CF_3SO_3)$  in acetone

**Fig. S4.** EPR spectrum of  $[(AN)Cu^{II}(Cl)](CF_3SO_3)$  in THF:MeCN (4:1)

**Fig. S5.** EPR spectrum of  $[(AN)Cu^{II}(NO_2)](CF_3SO_3)$  in acetone

**Fig. S6.** IR spectra (solid) of  $[(AN)Cu^{II}(Cl)](CF_3SO_3)$  and  $[(AN)Cu^{II}(NO_2)](CF_3SO_3)$

**Fig. S7.** UV-vis spectra of  $(TMPP)Fe^{II}$  in acetone and THF

**Fig. S8.** UV-vis spectra of  $(TMPP)Fe^{III}-O-Cu^{II}(tmpa)[B(C_6F_5)_4]$  in acetone and MeCN

**Fig. S9.** ESI-MS of  $(TMPP)Fe^{III}-O-Cu^{II}(tmpa)[B(C_6F_5)_4]$  in acetone

**Fig. S10.** UV-vis spectra of generation of  $(TMPP)Fe^{II}(NO)$  in acetone

**Fig. S11.** UV-vis spectra of generation of  $(TMPP)Fe^{II}(NO)$  in MeCN

**Fig. S12.** UV-vis spectra of reaction of  $[(AN)Cu^I][B(C_6F_5)_4]$  with nitrite in acetone

**Fig. S13.** UV-vis spectra of reaction of  $(TMPP)Fe^{II}$  with nitrite in acetone

**Fig. S14.** UV-vis spectra of  $[(TMPP)Fe^{III}]_2O$  in acetone and  $[(TMPP)Fe^{III}(OH)]$  in MeCN

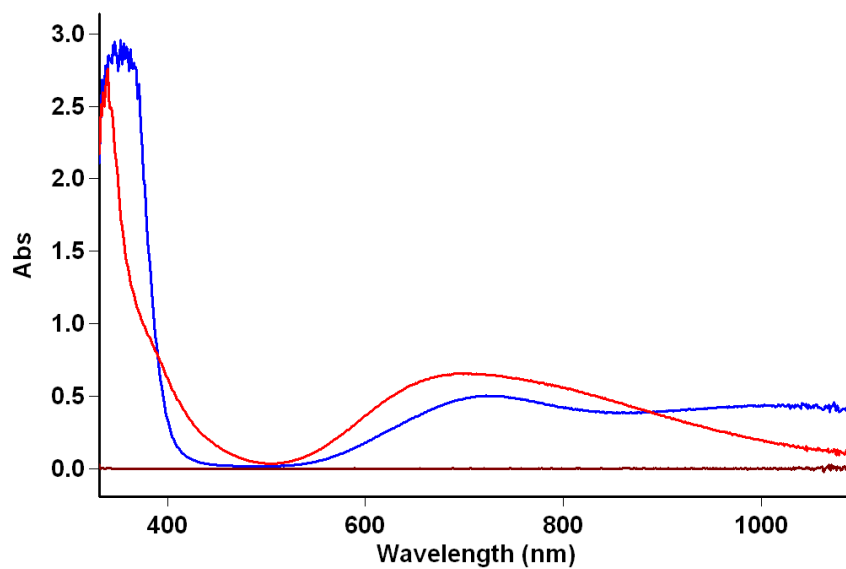

Fig. S1. UV-vis spectra of  $[(AN)Cu^{II}(Cl)](CF_3SO_3)$  (blue,  $\lambda_{max} = 720$  and 1025 nm) and  $[(AN)Cu^{II}(NO_2)](CF_3SO_3)$  (red,  $\lambda_{max} = 702$  nm) 2mM in acetone.

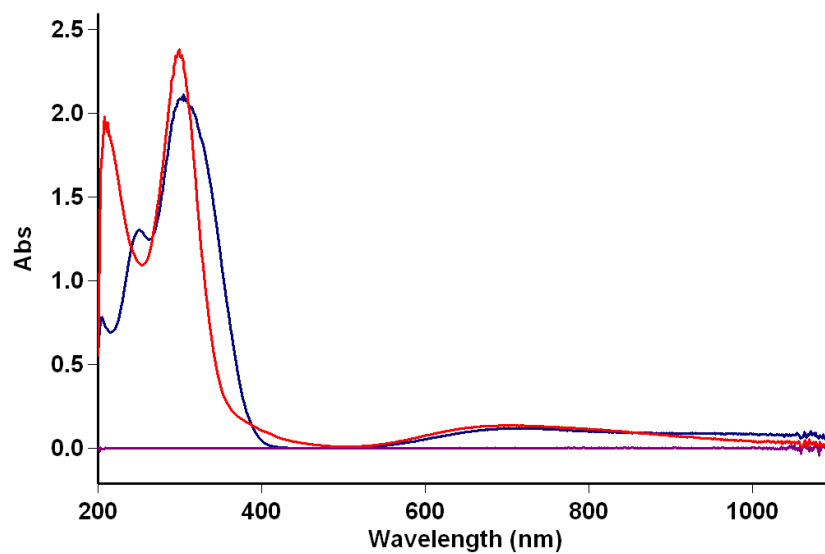

Fig. S2. UV-vis spectra of  $[(AN)Cu^{II}(Cl)](CF_3SO_3)$  (blue,  $\lambda_{max} = 722$  and 1000 nm) and  $[(AN)Cu^{II}(NO_2)](CF_3SO_3)$  (red,  $\lambda_{max} = 702$  nm) 2mM in MeOH.

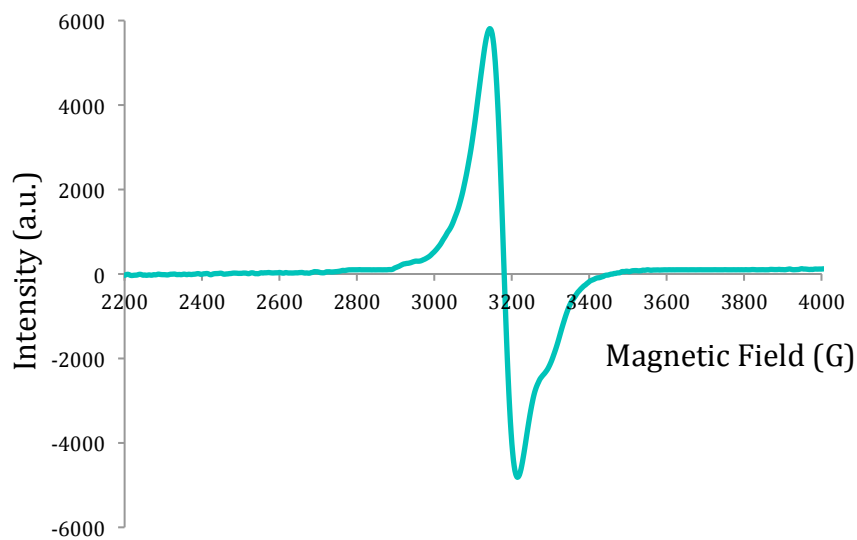

Fig. S3. EPR spectrum of  $[(AN)Cu^{II}(Cl)](CF_3SO_3)$  (2mM) in acetone at 22 K.

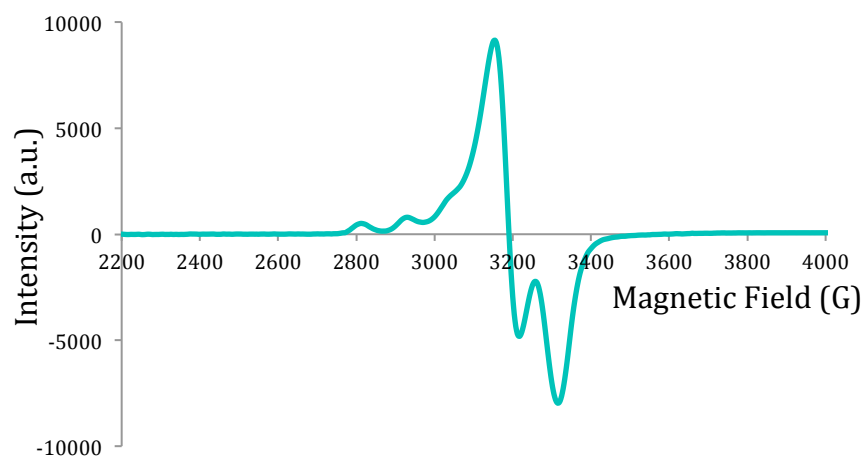

Fig. S4. EPR spectrum of  $[(AN)Cu^{II}(Cl)](CF_3SO_3)$  (2mM) in THF:MeCN (4:1) at 15 K.

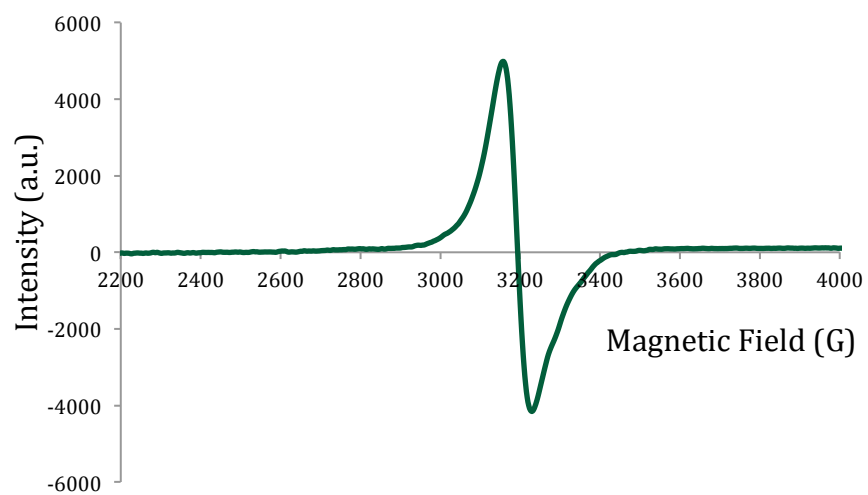

Fig. S5. EPR spectrum of  $[(AN)Cu^{II}(NO_2)](CF_3SO_3)$  (2mM) in acetone at 22 K.

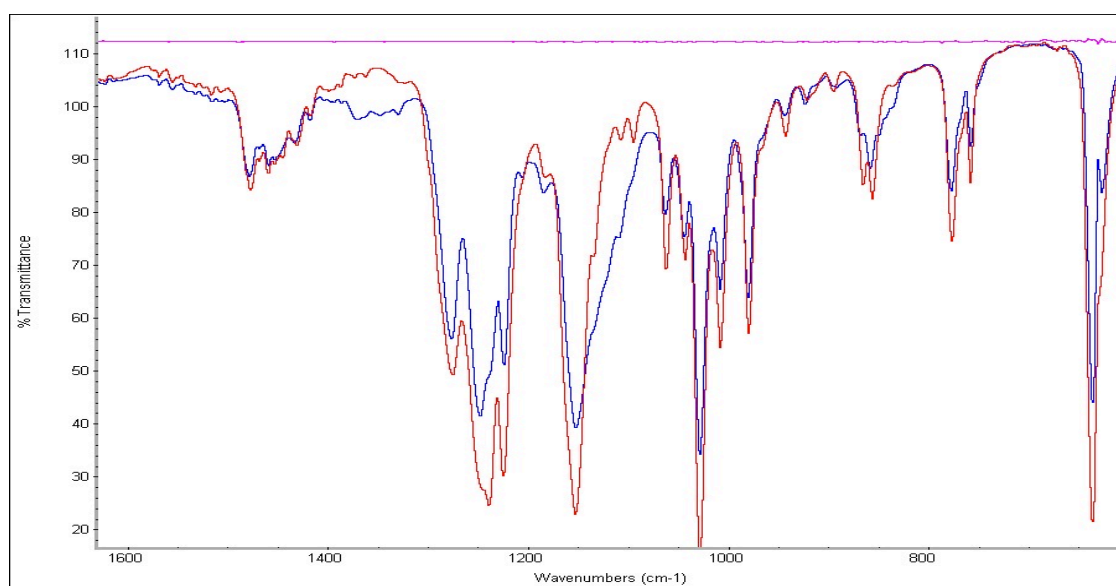

Fig. S6. IR spectra (solid) comparison between the two cupric complexes:  $[(AN)Cu^{II}(Cl)](CF_3SO_3)$  (red)  $[(AN)Cu^{II}(NO_2)](CF_3SO_3)$  (blue);  $\nu_{as}(NO_2)$   $1370\text{ cm}^{-1}$ ,  $\nu_s(NO_2)$   $1110\text{ cm}^{-1}$ , and  $\delta(NO_2)$   $835\text{ cm}^{-1}$ .

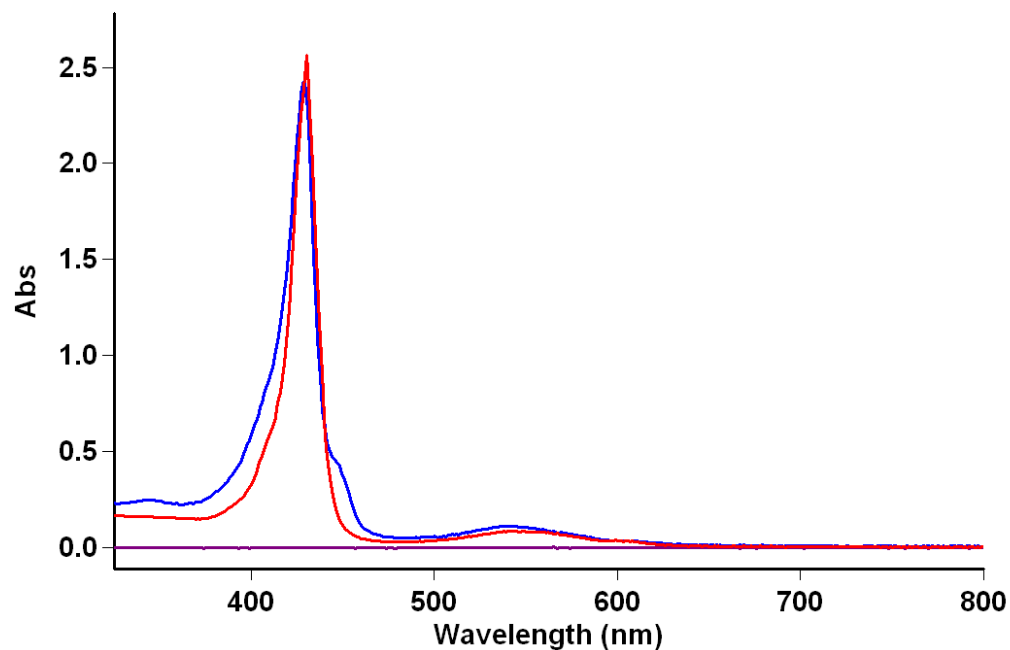

Fig. S7. UV-vis spectra of (TMPP)Fe<sup>II</sup> (10 μM) in acetone (blue,  $\lambda_{\text{max}} = 429$  and 540 nm) and THF (red,  $\lambda_{\text{max}} = 430$  and 542 nm).

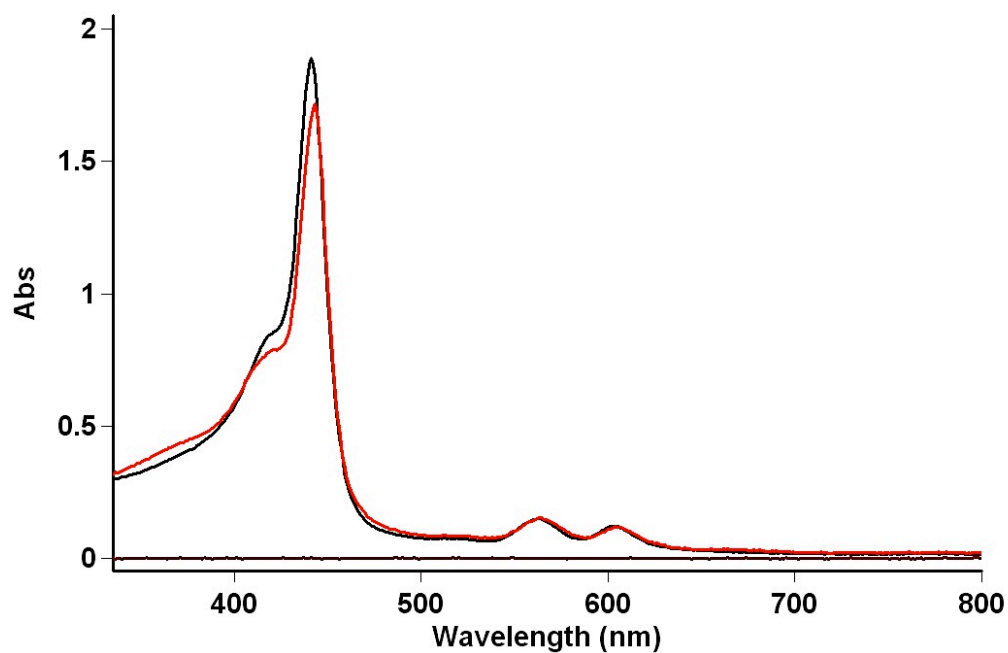

Fig. S8. UV-vis spectra of (TMPP)Fe<sup>III</sup>-O-Cu<sup>II</sup>(tpa)[B(C<sub>6</sub>F<sub>5</sub>)<sub>4</sub>] in acetone (7 μM) (red,  $\lambda_{\text{max}} = 443, 564$  and 605 nm) and MeCN (10 μM) (black,  $\lambda_{\text{max}} = 441, 561$  and 603 nm).

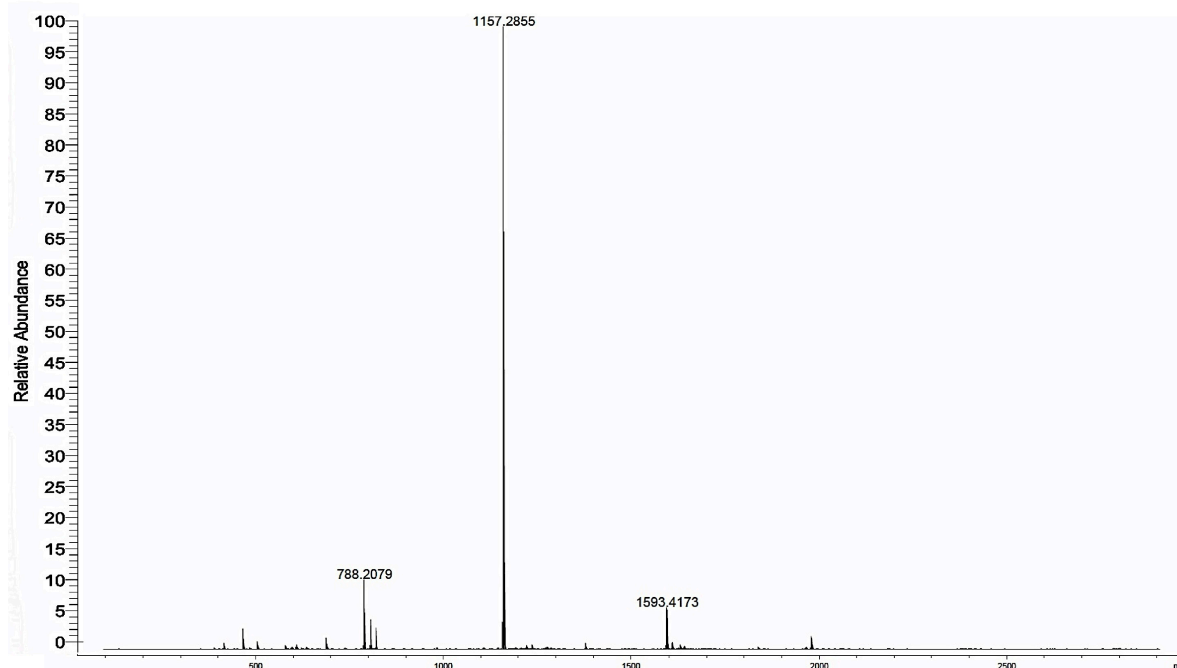

Fig. S9. ESI-MS of  $(\text{TMPP})\text{Fe}^{\text{III}}\text{-O-Cu}^{\text{II}}(\text{tmpa})[\text{B}(\text{C}_6\text{F}_5)_4]$  in acetone: 1157.3  $(\text{TMPP})\text{Fe-O-Cu}(\text{tmpa})$ ; 788.2  $(\text{TMPP})\text{Fe}$ ; 1593.4  $[(\text{TMPP})\text{Fe}]_2\text{O}$ .

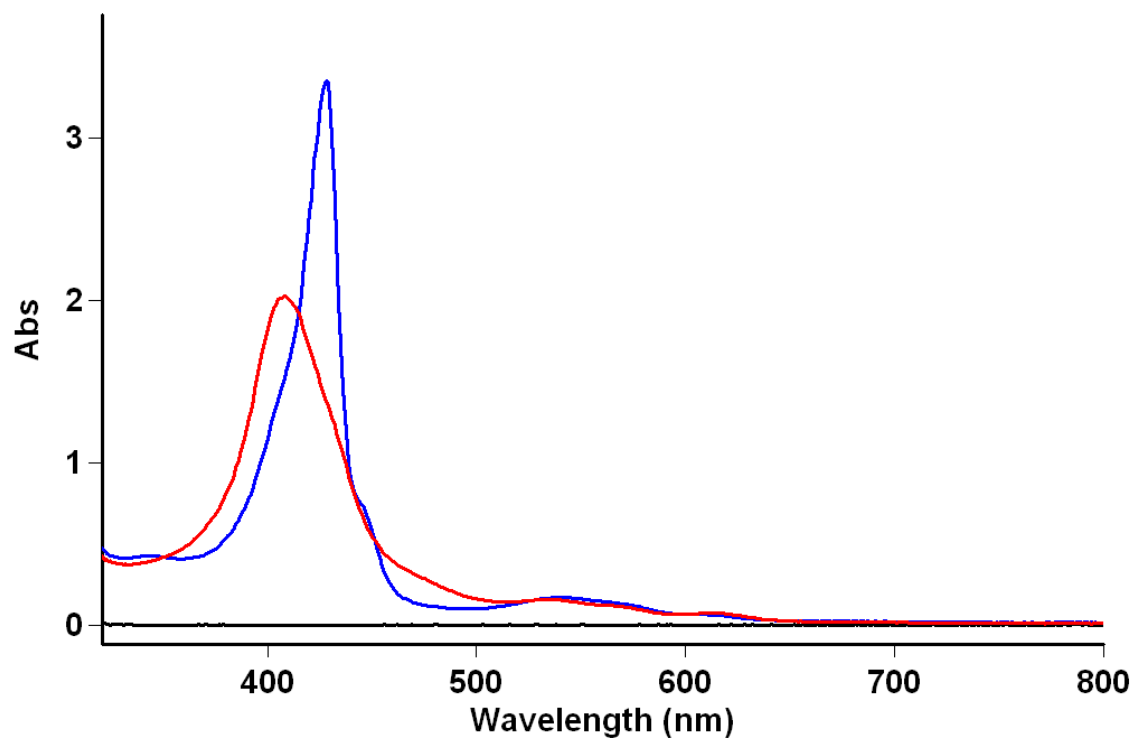

Fig. S10. UV-vis spectra of  $(\text{TMPP})\text{Fe}^{\text{II}}$  in acetone ( $14\mu\text{M}$ ) (blue,  $\lambda_{\text{max}} = 429$  and  $540$  nm) and after bubbling excess  $\text{NO}_{(\text{g})}$  through the solution to form  $(\text{TMPP})\text{Fe}^{\text{II}}(\text{NO})$  (red,  $\lambda_{\text{max}} = 410$ ,  $539$  and  $614$  nm).

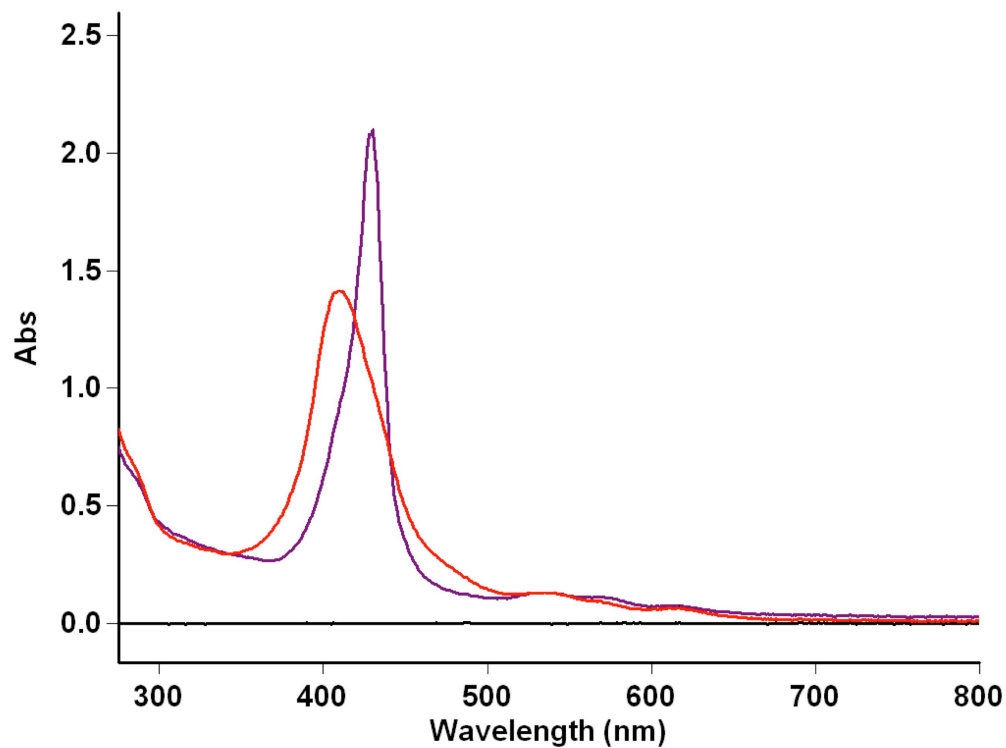

Fig. S11. UV-vis spectra of (TMPP)Fe<sup>II</sup> in MeCN (10µM) (purple,  $\lambda_{\text{max}} = 430$  and 533 nm) and after bubbling excess NO<sub>(g)</sub> through the solution to form (TMPP)Fe<sup>II</sup>(NO) (red,  $\lambda_{\text{max}} = 410$  and 535nm).

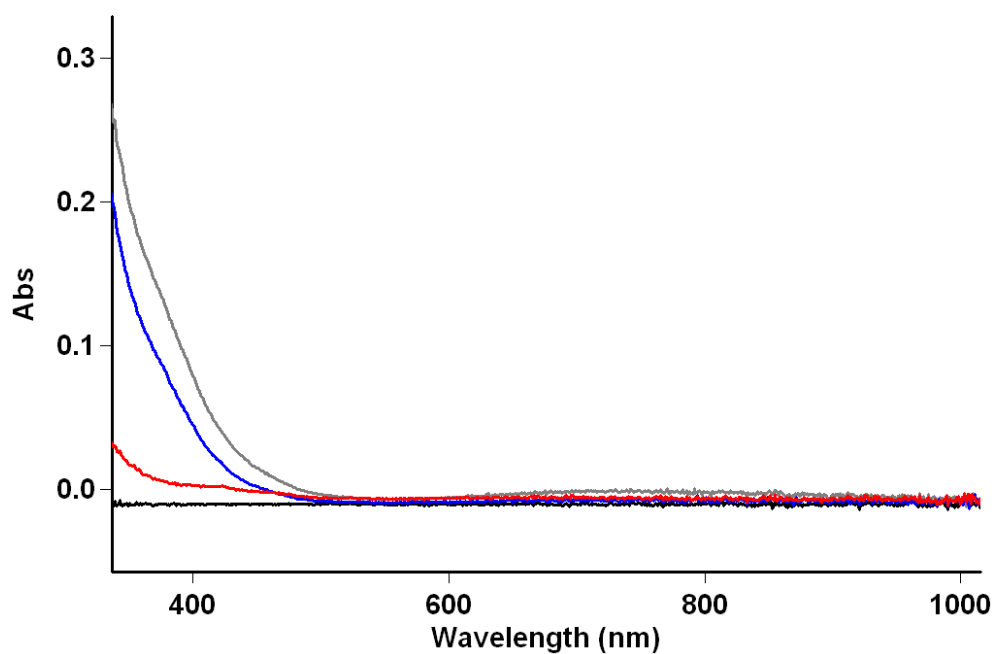

Fig. S12. UV-vis spectra of [(AN)Cu<sup>I</sup>][B(C<sub>6</sub>F<sub>5</sub>)<sub>4</sub>] in acetone (10µM) (red), after addition of 1 equiv of (Bu)<sub>4</sub>N(NO<sub>2</sub>) (blue) and after stirring overnight (gray).

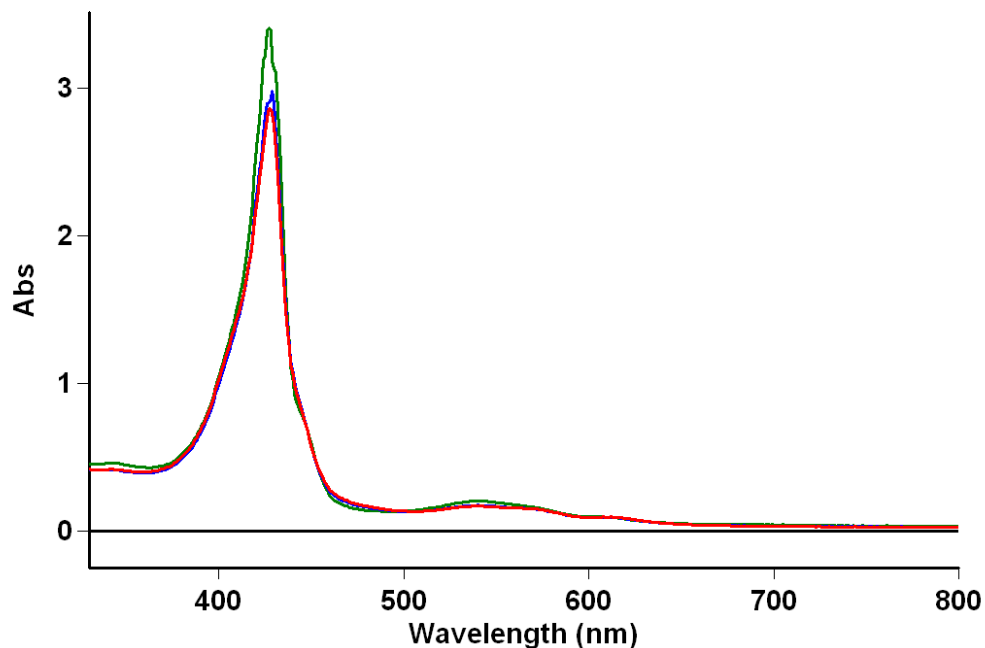

Fig. S13. UV-vis spectra of (TMPP)Fe<sup>II</sup> in acetone (14 µM) (green,  $\lambda_{\text{max}} = 429$  and 540 nm), after addition of 1 equiv of (Bu)<sub>4</sub>N(NO<sub>2</sub>) (blue) and after stirring for 5 h (red).

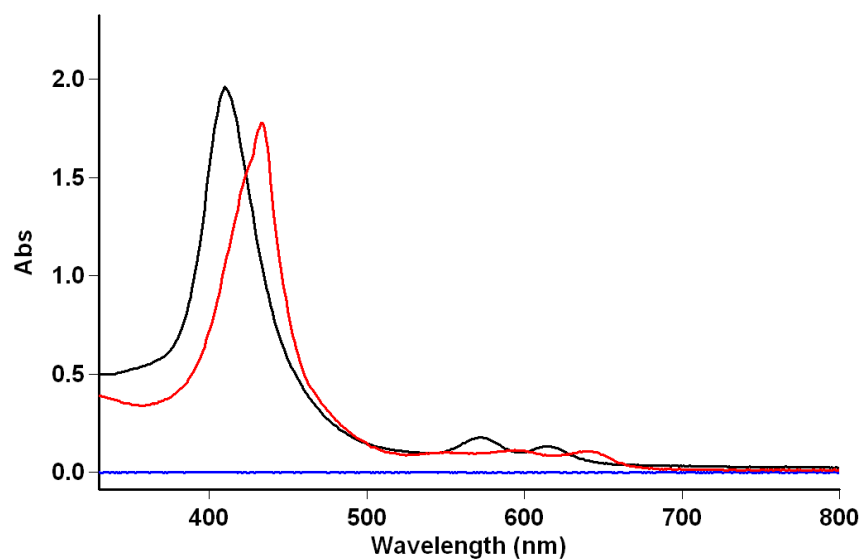

Fig. S14. UV-vis spectra of [(TMPP)Fe<sup>III</sup>]<sub>2</sub>O in acetone (15 µM) (black,  $\lambda_{\text{max}} = 412$ , 572 and 614 nm) and [(TMPP)Fe<sup>III</sup>(OH)] in MeCN (10 µM) (red,  $\lambda_{\text{max}} = 434$ , 594 and 640 nm). NOTE: To obtain the spectrum of (TMPP)Fe<sup>III</sup>(OH), we first synthesized [(TMPP)Fe<sup>III</sup>(THF)<sub>2</sub>](SbF<sub>6</sub>) via AgSbF<sub>6</sub> addition to (TMPP)Fe<sup>III</sup>(Cl) in THF solvent, for which full experimental details will be presented elsewhere. Then, to a MeCN solution of [(TMPP)Fe<sup>III</sup>(THF)<sub>2</sub>](SbF<sub>6</sub>) was added a small excess of tetraethylammonium hydroxide.
